# Supplementary material for: Transcriptomic Profiling of Control and Thyroid-Associated Orbitopathy (TAO) Orbital Fat and TAO Orbital Fibroblasts Undergoing Adipogenesis
Source: PubMed Central journal article supplement — Invest Ophthalmol Vis Sci. 2021 Jul 16;62(9):24. doi: 10.1167/iovs.62.9.24 (PMC8297424; doi:10.1167/iovs.62.9.24), 2021-07-16
Supplement: iovs-62-9-24_s001.pdf [file iovs-62-9-24_s001.pdf]

Pearson Correlation

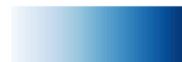

-1.0 0.0 1.0

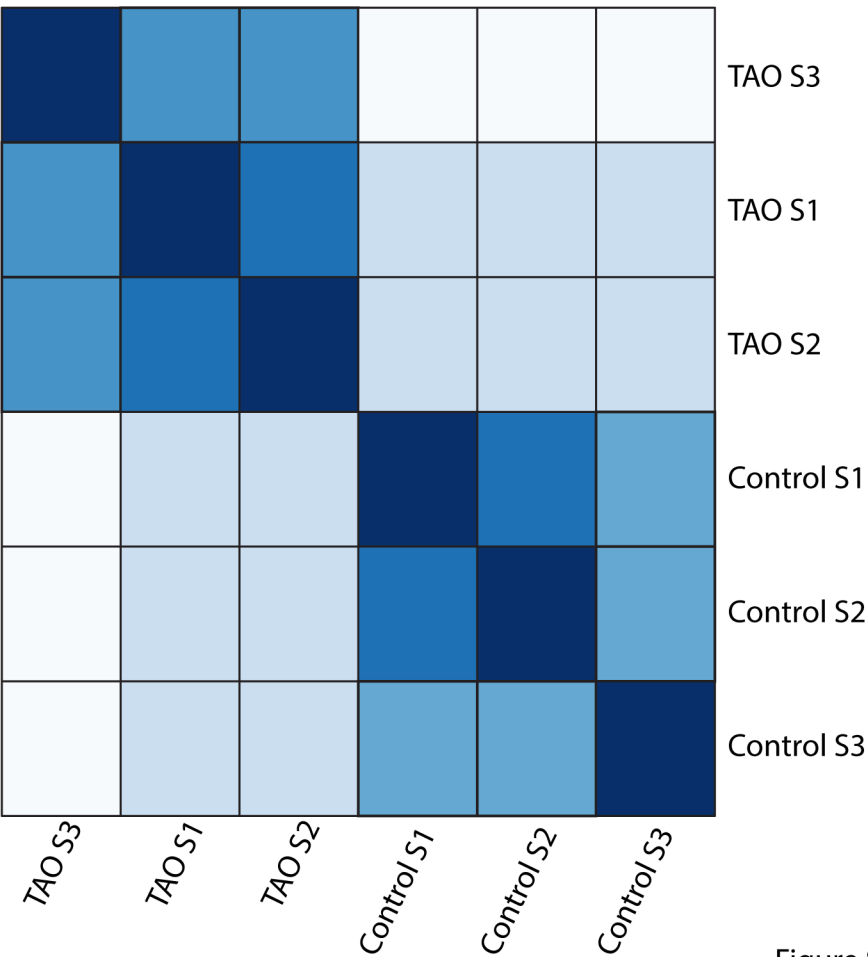

Figure S1

**Figure S1. Correlation plot of Figure 1.** This demonstrates the correlation between TAO Samples (S) 1-3 and Control S1-3.
