# Supplementary material for: Transcriptomic Profiling of Control and Thyroid-Associated Orbitopathy (TAO) Orbital Fat and TAO Orbital Fibroblasts Undergoing Adipogenesis
Source: PubMed Central journal article supplement — Invest Ophthalmol Vis Sci. 2021 Jul 16;62(9):24. doi: 10.1167/iovs.62.9.24 (PMC8297424; doi:10.1167/iovs.62.9.24), 2021-07-16
Supplement: iovs-62-9-24_s002.pdf [file iovs-62-9-24_s002.pdf]

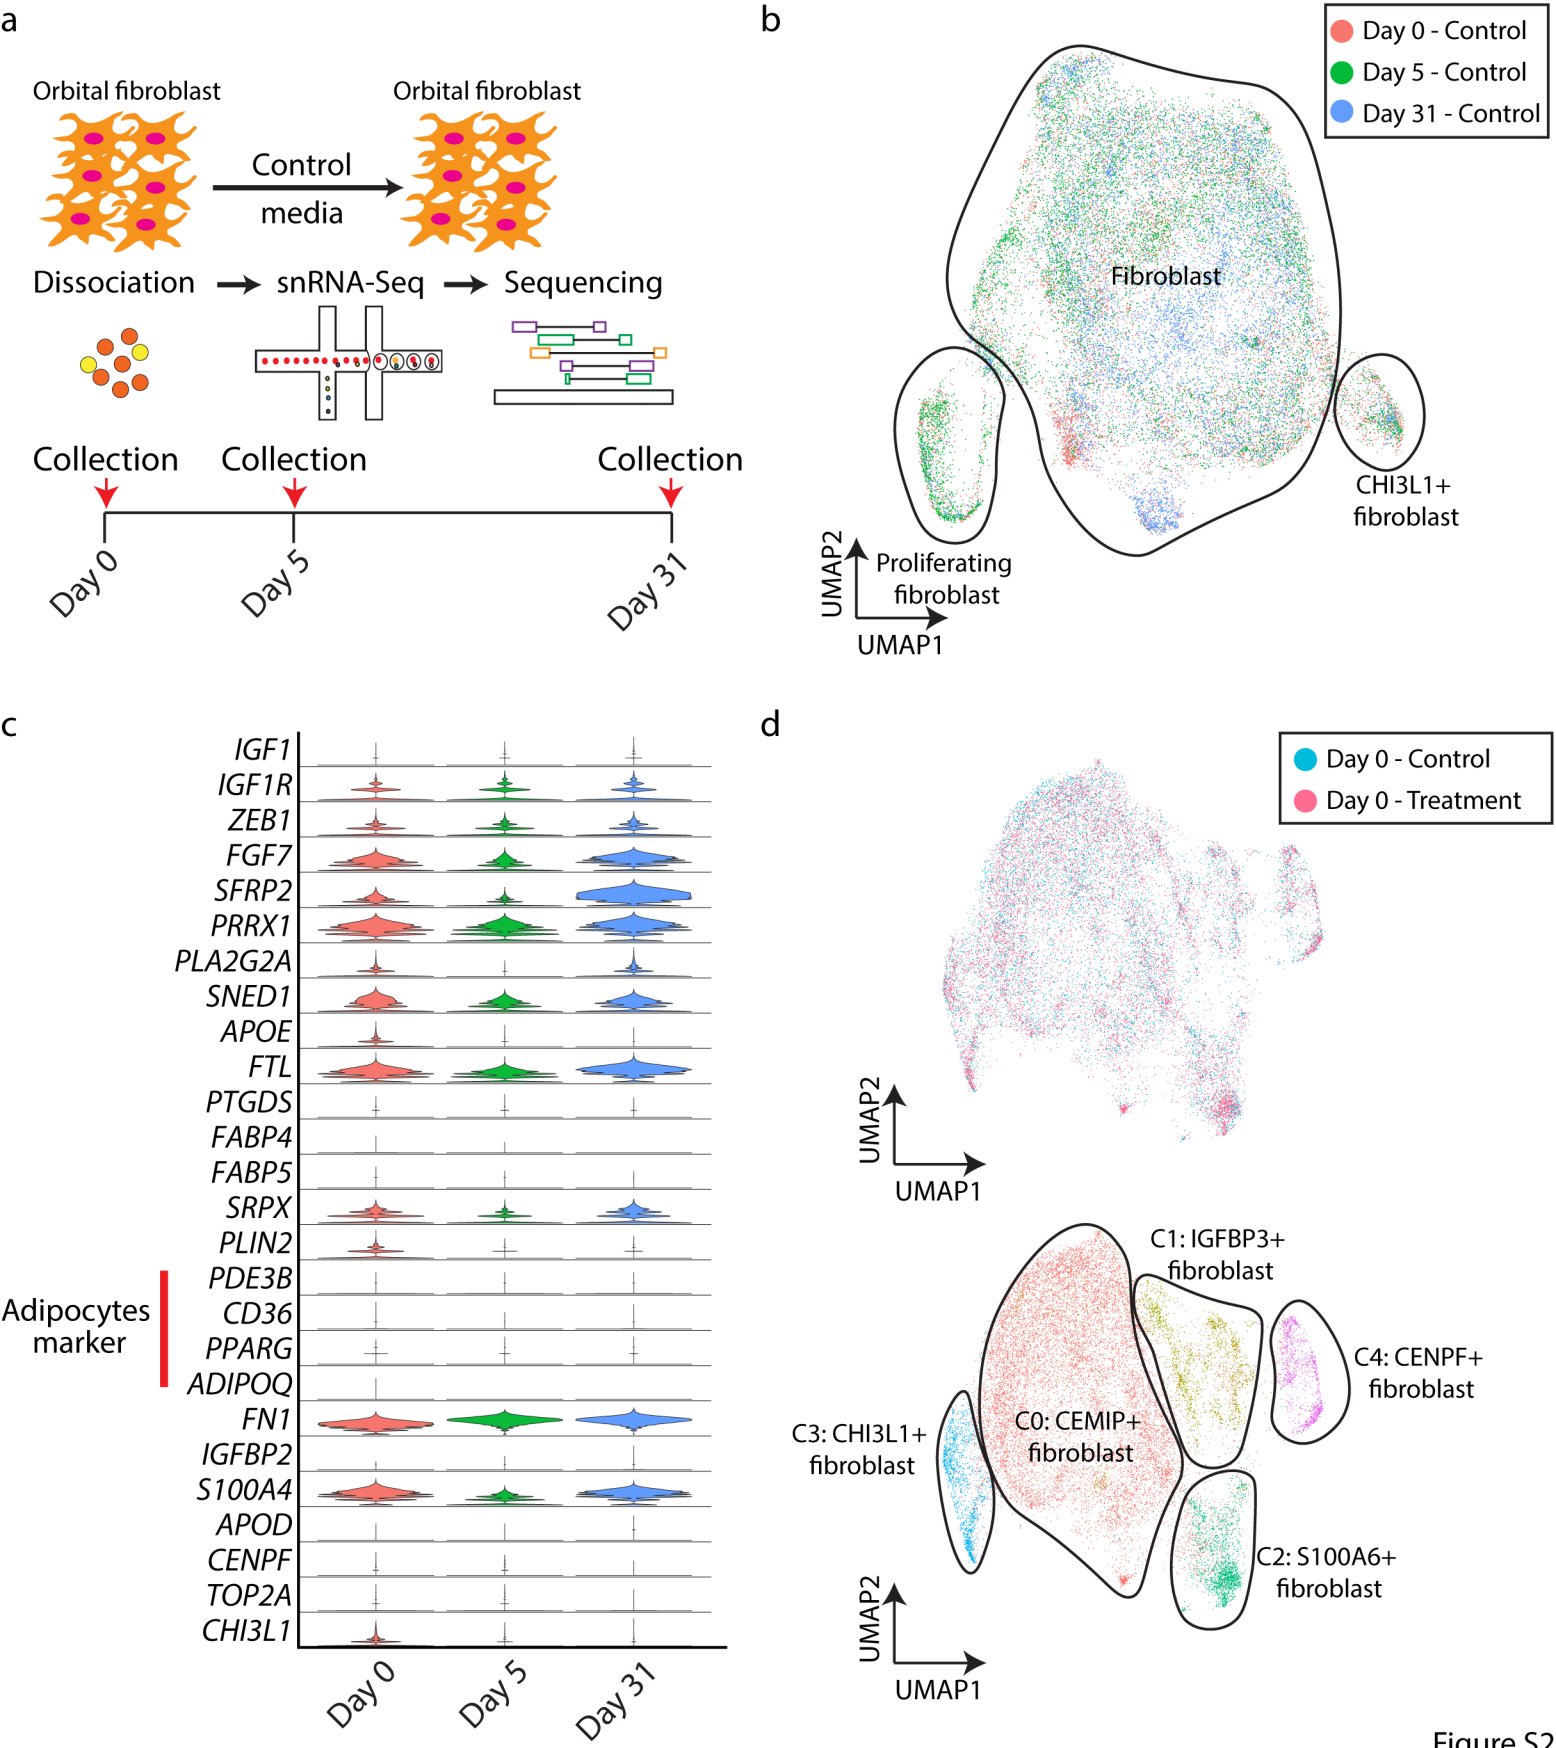

Figure S2

**Figure S2. snRNA-Seq of the control dataset.** (a) Schematic diagram showing snRNA-Seq pipeline. (b) UMAP plot showing snRNA-Seq of control samples. (c) Violin plot showing key cluster markers in panel b. (d) UMAP plot showing day 0 control and treatment snRNA-Seq (top), UMAP plot showing different fibroblast subtypes in day 0 control and treatment snRNA-Seq (bottom).
