# Supplementary material for: Transcriptomic Profiling of Control and Thyroid-Associated Orbitopathy (TAO) Orbital Fat and TAO Orbital Fibroblasts Undergoing Adipogenesis
Source: PubMed Central journal article supplement — Invest Ophthalmol Vis Sci. 2021 Jul 16;62(9):24. doi: 10.1167/iovs.62.9.24 (PMC8297424; doi:10.1167/iovs.62.9.24), 2021-07-16
Supplement: iovs-62-9-24_s003.pdf [file iovs-62-9-24_s003.pdf]

a

Day 0, 5, 9, 12  
Treatment snRNA-Seq

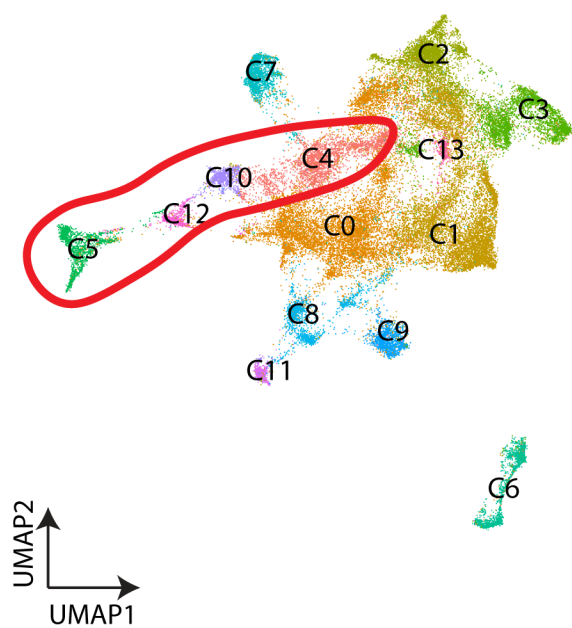

b

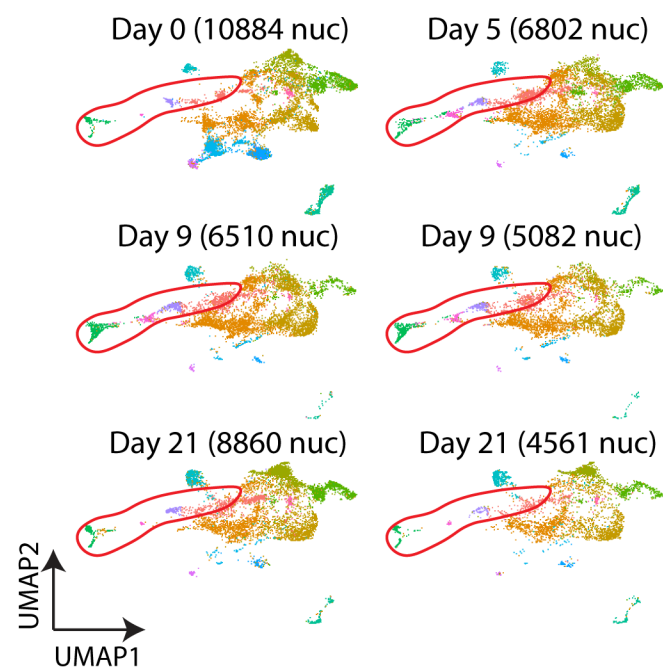

c

*IGF1**APOE*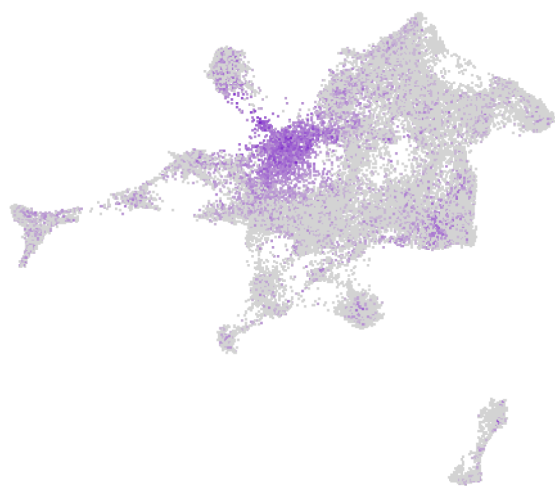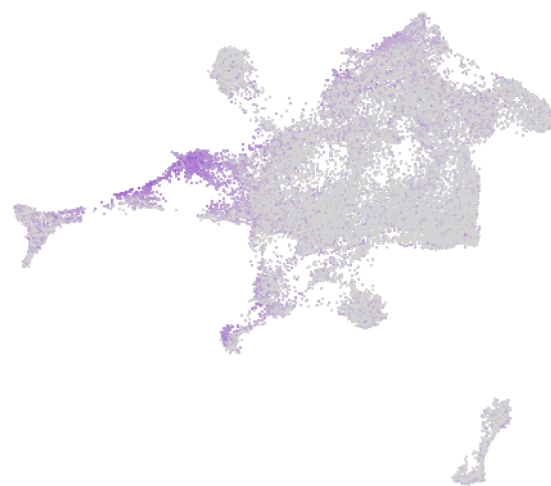*FABP4**ADIPOQ*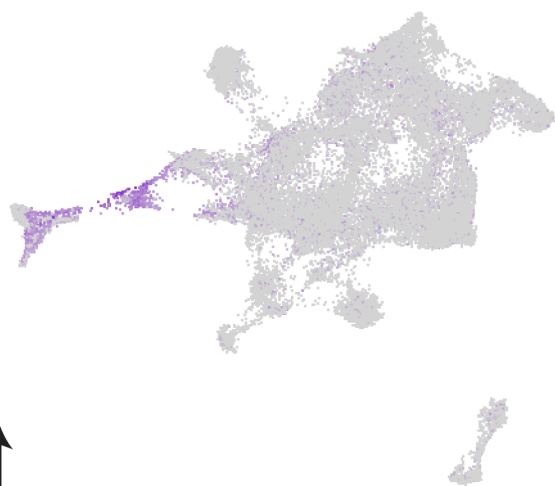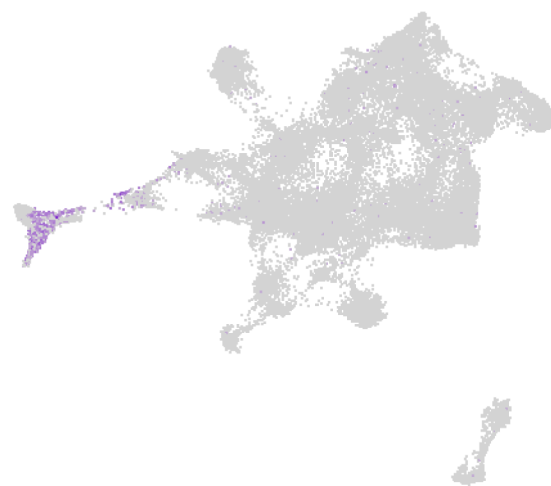

**Figure S3. snRNA-Seq of the overall dataset.** (a,b) UMAP plot showing the distribution of clusters across the entire dataset (a) and distribution across each treatment age or replicates (Day 9 and Day 21) (b). Red lines in panels a and b indicate cells are undergoing adipogenesis. (c) Gene expression showing unique genes that are enriched in cells that are undergoing adipogenesis.
